# Supplementary material for: Genome Mining and Heterologous Expression of Lipoamides and Amicoumacins From Compost-Associated <em>Bacillus subtilis</em> fmb60
Source: Preprints.org preprint supplement (doi:10.20944/preprints202103.0134.v1), 2021-03-03
Supplement: Supplementary file 1 [file supplementary]

**Supporting Information**

## Genome mining and heterologous expression of lipoamides and amicoumacins from compost-associated *Bacillus subtilis* fmb60

Jie Yang1, 2, 5, Qingzheng Zhu1, Feng Xu1, Ming Yang3, Hechao Du2, Xiaoying Bian3, Zhaoxin Lu2, Yingjian Lu4, *, and Fengxia Lu2,*

1School of Food Science and Engineering, Jiangsu Ocean University, Lianyungang 222005, China

2College of Food Science and Technology, Nanjing Agricultural University, 1 Weigang, Nanjing 210095, China

3Helmholtz Institute of Biotechnology, State Key Laboratory of Microbial Technology, Shandong University, Qingdao 266237, China

4College of Food Science and Engineering, Nanjing University of Finance and Economics, Nanjing 210003, China

5Jiangsu Marine Resources Development Research Institute, Lianyungang, 222000, China

*Corresponding author (Tel: +86-2584395155; Fax: +86-2584395155; E-mail: yingjianlu@nufe.edu.cn), (Tel: +86-2584395963; Fax: +86-2584395963; E-mail: lufengxia@njau.edu.cn)

Table S1. Strains and plasmids in this study

| Name | Description | Ref. |
| --- | --- | --- |
| *E. coli* strains |  |  |
| GB2005 | F-mcrAΔ (mrr-hsdRMS-mcrBC) φ80lacZΔM15 ΔlacX74 recA1 endA1 araD139 Δ (ara, leu) 7697 galU galK λ rpsL nupG fhuA::IS2 recET redα, phage T1-resistant | (22) |
| GB05-dir | GB2005, araC-BAD-ETγA | (22) |
| GB05-MtaA | (GB2005, mtaA-genta) a pPant transferase gene from myxobacterium *Stigmatella* *aurantiaca* DW4/3-1 was randomly transposed into the chromosome for expression of secondary metabolite |  |
| GB05-MtaA-*ami* | Plasmid in *E. coli* GB05-MtaA, for expressiong of NRPS/PKS gene cluster, CmR | This study |
| GB05-MtaA-*ami*-*ace* | Plasmid in *E. coli* GB05-MtaA, for expressiong of NRPS/PKS and *ace* gene cluster, CmR | This study |
| Plasmids |  |  |
| p15A-*cm*-*tet*R-*ccdB*-*hyg* | PCR template to generate a linear vector for direct cloning | (23) |
| p15A-*cm*-*ami* | recombinant plasmid with entire *ami* gene cluster | This study |
| pBR322-*apra*-OriT | PCR template to generate a linear vector for *ace* gene cluster cloning | Lab stored |
| pBR322-*apra*-*ace* | recombinant plasmid with entire *ace* gene cluster | This study |

Table S2. List of primers used in this study

| Primer | Sequence (5’-3’) | Description |
| --- | --- | --- |
| YM-*ami*-5 | GCTGTAATCTCATGTAAAGCAGGAGAAACGCCGCCCA  GCTGGGTAAAAGCAACGATCGGCACAGATCCGAAAA  CCCCAAGTTACG | Clone *ami* gene cluster |
| YM-*ami*-3 | CACGACTTCCGGAATGATATCGCCCGCTTTTTTGATGA  CGACCTTATCCAAAATCCGAATGTTTCGGCCTTGAATT  GATCATATGC | Clone *ami* gene cluster |
| ace-pBR322-HAF | CAAATTGTCAACAGACAAGAACTAAAGAGAGTGATG  CAGGTACATGAACGCTCAGTGGAACGAGGT | Clone *ace* gene cluster |
| ace-pBR322-HAR | CTGATTTTGCGAAAGATATCGAAACAACTGAAGGAAG  CCCTGAATAACGCGTTGCTGGCGTTTTTC | Clone *ace* gene cluster |
| ace-F | TTATTCAGGGCTTCCTTCAGT | Clone *ace* gene cluster |
| ace-R | TCATGTACCTGCATCACTCT | Clone *ace* gene cluster |

Table S3. Secondary Metabolite Biosynthetic Gene Clusters Identified by AntiSMASH

| Clusters | Synthetase type | Most similar known cluster | Location | MIBiG BGC-ID |
| --- | --- | --- | --- | --- |
| Cluster 1 | Microcin |  | 52718…83567 |  |
| Cluster 2 | NRPS | Surfactin biosynthetic gene cluster (78% genes show similarity) | 255220…320611 | BGC 0000433_c1 |
| Cluster 3 | Microcin |  | 521848…541996 |  |
| Cluster 4 | NRPS/Type I PKS | xenocoumacin biosynthetic gene cluster (28% genes show similarity) | 592175…673526 | BGC0001054_c1 |
| Cluster 5 | Type I PKS | Bacillaene biosynthetic gene cluster (59% genes show similarity) | 854869…954351 | [BGC0001089_c1](http://mibig.secondarymetabolites.org/repository/BGC0001089/index.html) |
| Cluster 6 | Terpene |  |  |  |
| Cluster 7 | NRPS | Fengycin biosynthetic gene cluster (100% of genes show similarity) | 1844656…1928055 | BGC 0000407_c1 |
| Cluster 8 | Terpene |  | 1995630…2017528 |  |
| Cluster 9 | Type III PKS |  | 2064193…2105290 |  |
| Cluster 10 | Microcin |  | 2914253…2934401 |  |
| Cluster 11 | NRPS | Bacillibactin biosynthetic gene cluster (92% genes show similarity) | 3050057…3099798 | BGC 0000309_c1 |
| Cluster 12 | Thiopeptide |  | 3117266…3146494 |  |
| Cluster 13 | Sactipeptide | Subtilosin A biosynthetic gene cluster (87% of genes show similarity) | 3651570…3673181 | [BGC0000602_c1](http://mibig.secondarymetabolites.org/repository/BGC0000602/index.html) |
| Cluster 14 | Other | Bacilysin biosynthetic gene cluster (100% of genes show similarity) | 3688160…3729578 | [BGC0001184_c1](http://mibig.secondarymetabolites.org/repository/BGC0001184/index.html) |
| Cluster 15 | Microcin |  | 4056415…4076563 |  |
| Cluster 16 | Microcin |  | 4076957…4097105 |  |
| Cluster 17 | Microcin |  | 4137409…4150267 |  |

Table S4. Proteins encoded by *ami* cluster and open reading frames adjacent to *ami* cluster as well as their proposed function and size

| Protein | Size (aa) | Proposed function | Accession No | Identity (%) |
| --- | --- | --- | --- | --- |
|
| Orf 1 | 397 | Putative MFS family major facilitator transporter (WP_003240131.1) | OEI73252.1 | 98 |
| AmiA | 1498 | Amino acid adenylation domain-containing protein (WP_003240128.1) | OEI73253.1 | 96 |
| AmiB | 501 | β-lactamase (WP_003240126.1) | OEI73254.1 | 93 |
| AmiC | 327 | Hypothetical protein (WP_003240124.1) | OEI73255.1 | 95 |
| AmiD | 233 | Thioesterase (WP_003240123.1) | OEI73256.1 | 97 |
| AmiE | 284 | 3-hydroxybutyryl-coA dehydrogenase (WP_003240121.1) | OEI73257.1 | 98 |
|
| AmiF | 353 | Methoxymalonyl-ACP biosynthesis protein (WP_003240119.1) | OEI73258.1 | 98 |
|
| AmiG | 89 | Acyl carrier protein (WP_003240117.1) | OEI73259.1 | 100 |
|
| AmiH | 380 | Acyl-CoA dehydrogenase (NADP(+)) (WP_003240115.1) | OEI73260.1 | 98 |
|
| AmiI | 3032 | Nonribosomal peptide synthetase-polyketide synthase hybrid (WP_003240114.1) | OEI73261.1 | 95 |
| AmiJ | 889 | Nonribosomal peptide synthetase subunit (WP_003240112.1) | OEI73262.1 | 94 |
|
| AmiK | 1507 | Putative polyketide synthase PksJ (PKS) (WP_003240111.1) | OEI73263.1 | 95 |
|
| AmiL | 2517 | Polyketide synthase subunit (WP_003240108.1) | AFI27291.1 | 96 |
| AmiM | 2142 | Polyketide synthase subunit (WP_003240106.1) | OEI73264.1 | 96 |
| AmiN | 333 | Putative kinase (WP_003240104.1) | OEI73265.1 | 98 |
| AmiO | 459 | Alkaline phosphatase (WP_003240102.1) | OEI73266.1 | 96 |
| Orf 2 | 230 | Membrane component (WP_003240098.1) | OEI73267.1 | 99 |


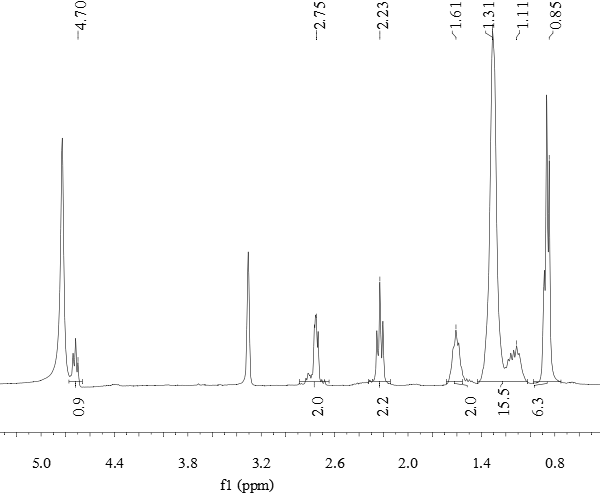


**Figure S1.** 1H-NMR spectrum of **1** in methanol-*d4*.


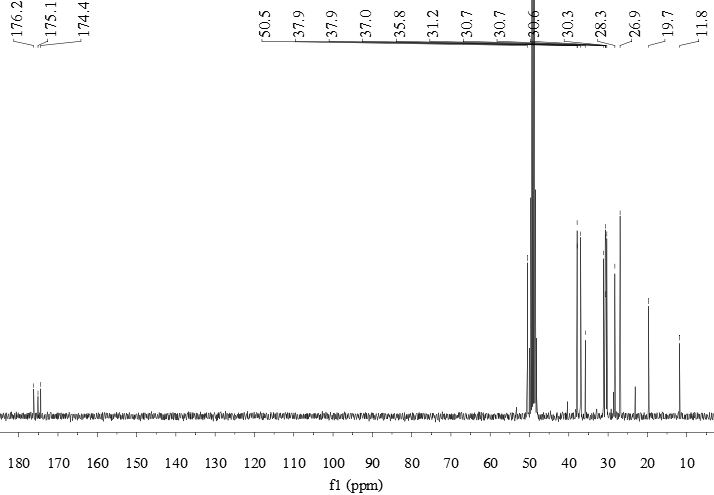


**Figure S2.** 13C-NMR spectrum of **1** in methanol-*d4*.


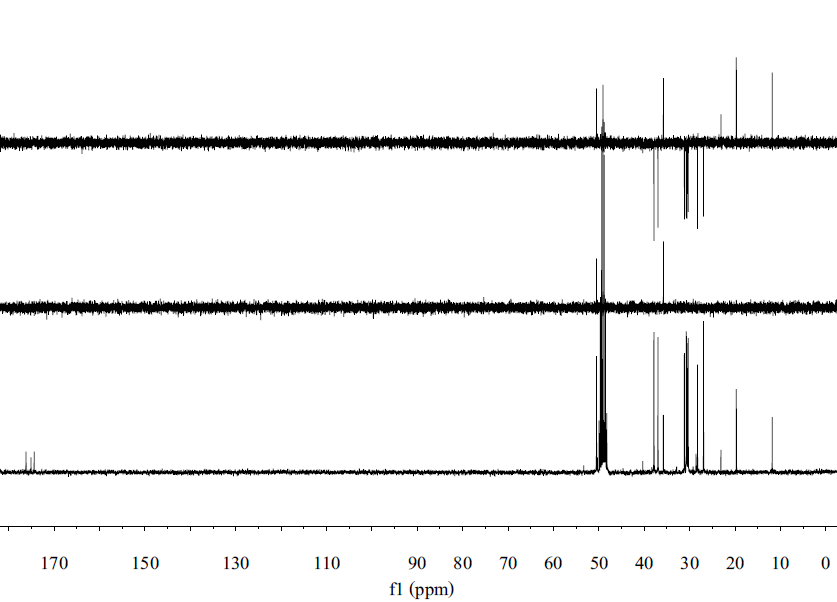


**Figure S3.** DEPT spectrum of **1** in methanol-*d4*.


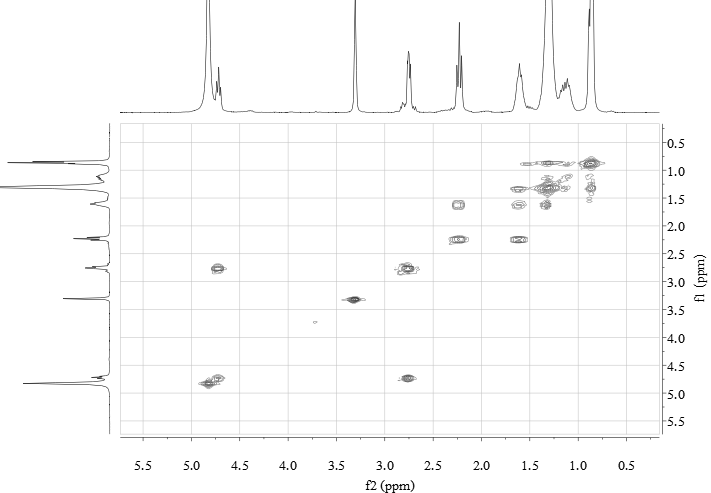


**Figure S4.** COSY spectrum of **1** in methanol-*d4*.


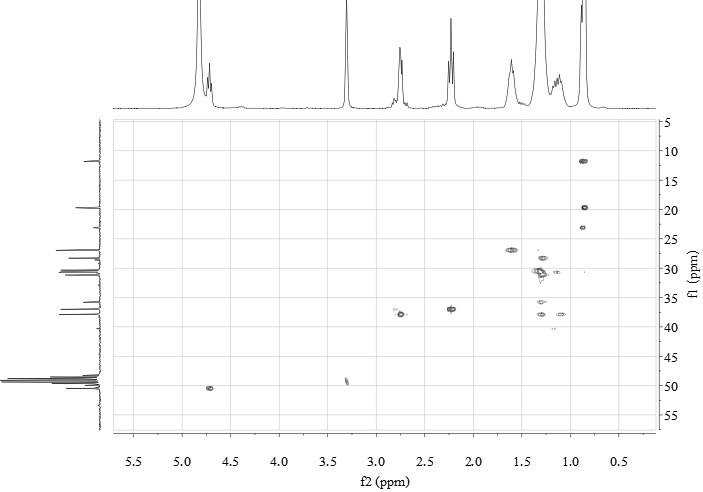


**Figure S5.** HSQC spectrum of **1** in methanol-*d4*.


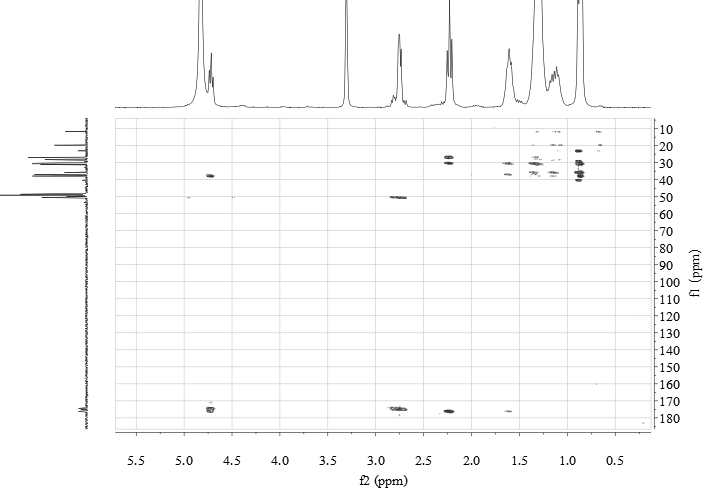


**Figure S6.** HMBC spectrum of **1** in methanol-*d4*.

**
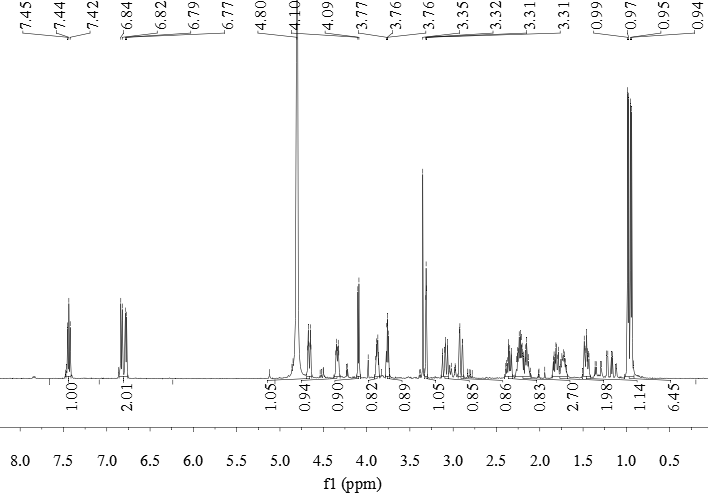
** **Figure S7.** 1H-NMR spectrum of **4** in methanol-*d4*.

**
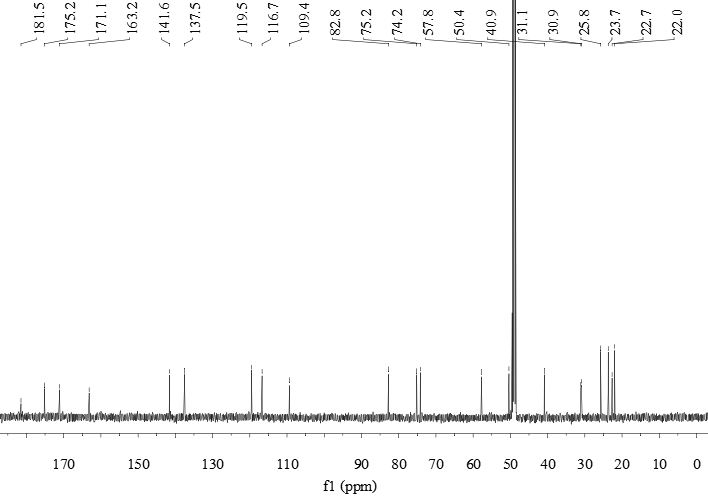
 Figure S8.** 13C-NMR spectrum of **4** in methanol-*d4*.


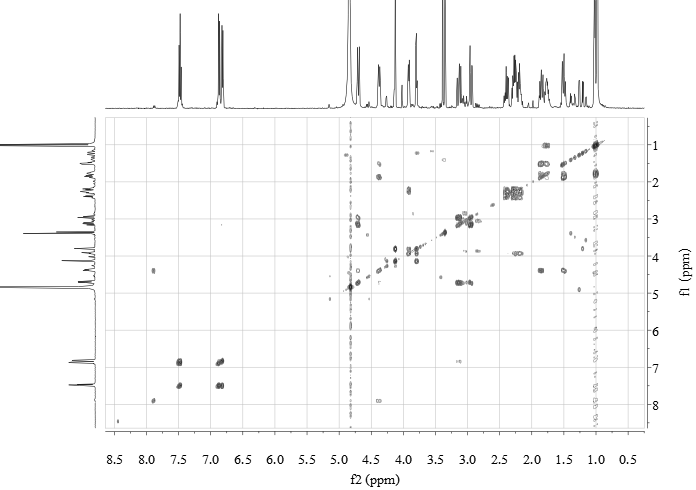


**Figure S9.** COSY spectrum of **4** in methanol-*d4*.


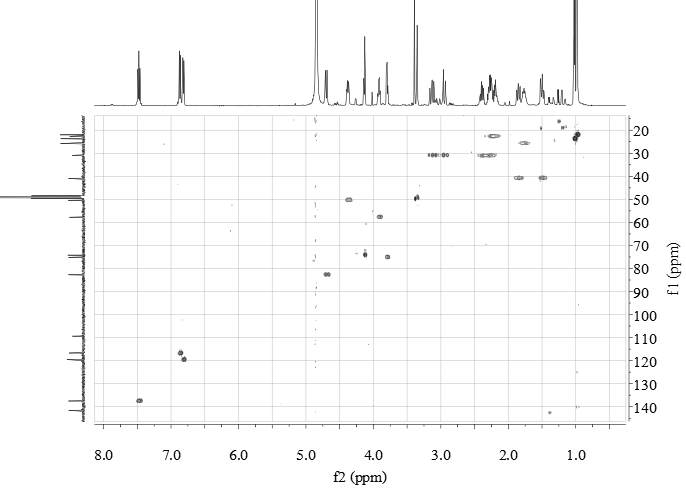


**Figure S10.** HSQC spectrum of **4** in methanol-*d4*.


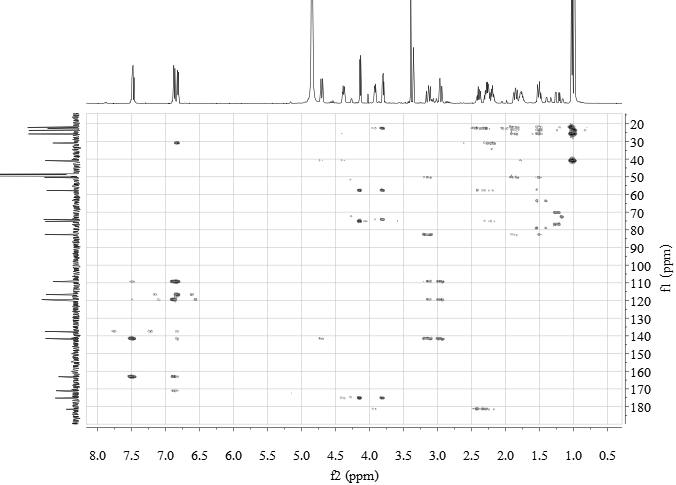


**Figure S11.** HMBC spectrum of **4** in methanol-*d4*.


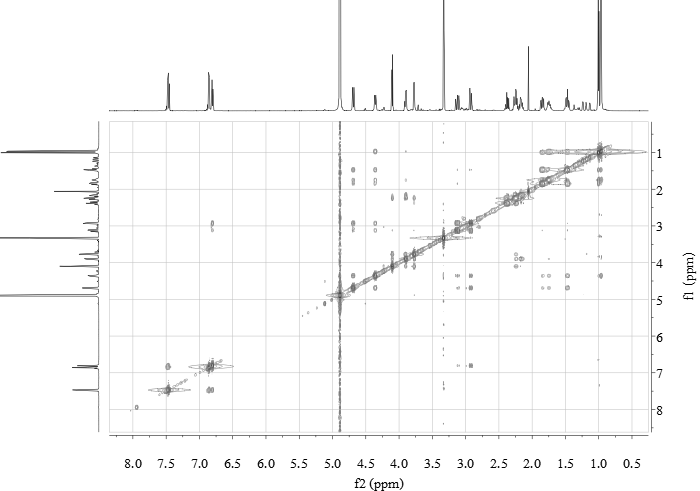


**Figure S12.** NOESY spectrum of **4** in methanol-*d4*.

**
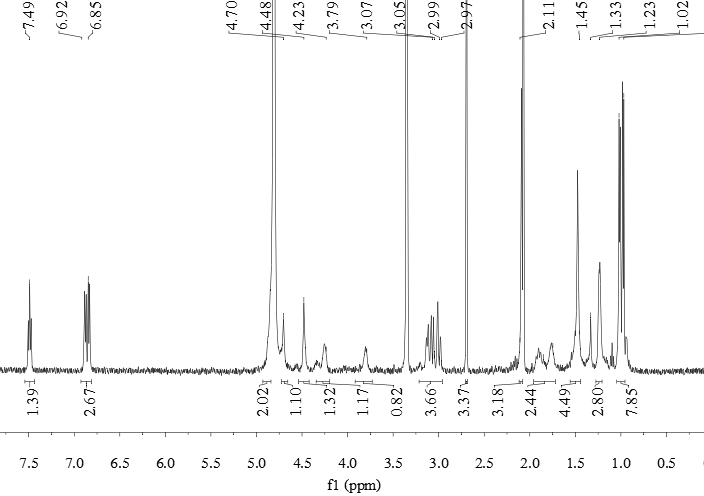
** **Figure S13.** 1H-NMR spectrum of **5** in methanol-*d4*.

**
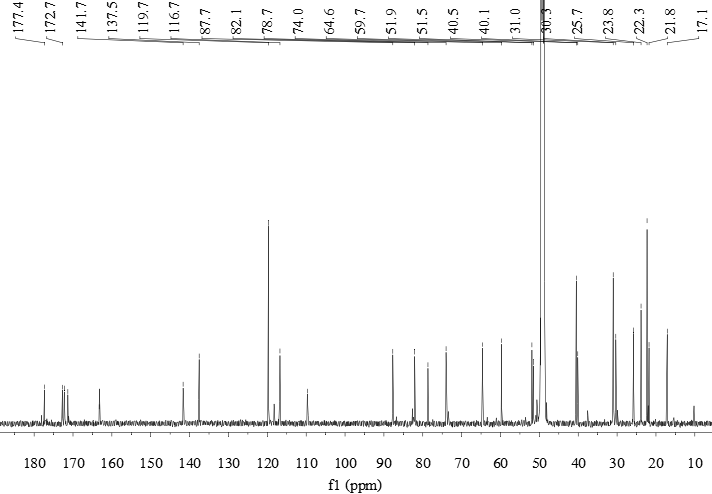
** **Figure 14.** 13C-NMR spectrum of **5** in methanol-*d4*.


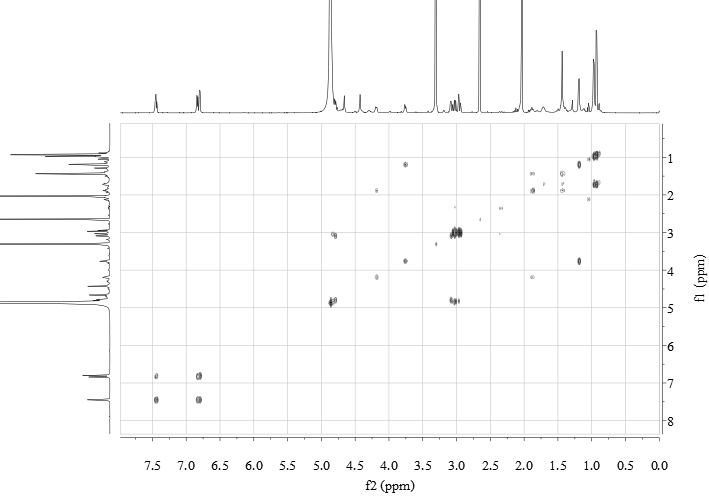


**Figure S15.** COSY spectrum of **5** in methanol-*d4*.


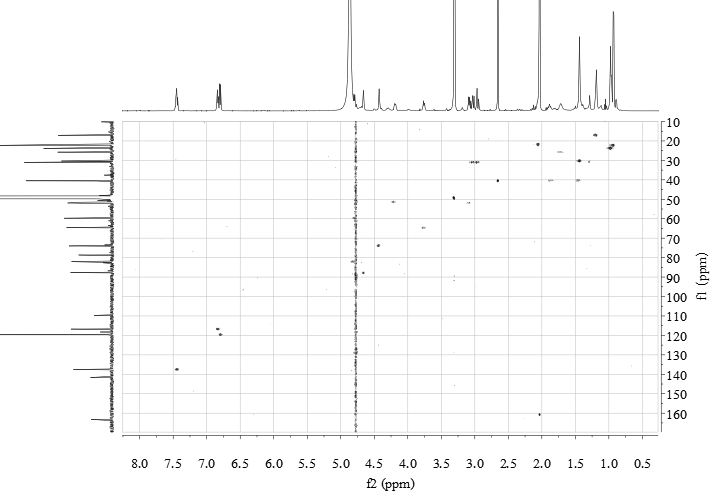


**Figure S16.** HSQC spectrum of **5** in methanol-*d4*.


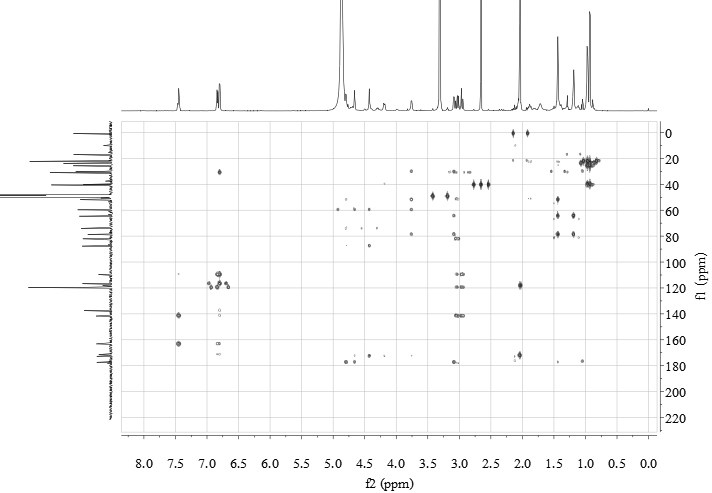


**Figure S17.** HMBC spectrum of **5** in methanol-*d4*.


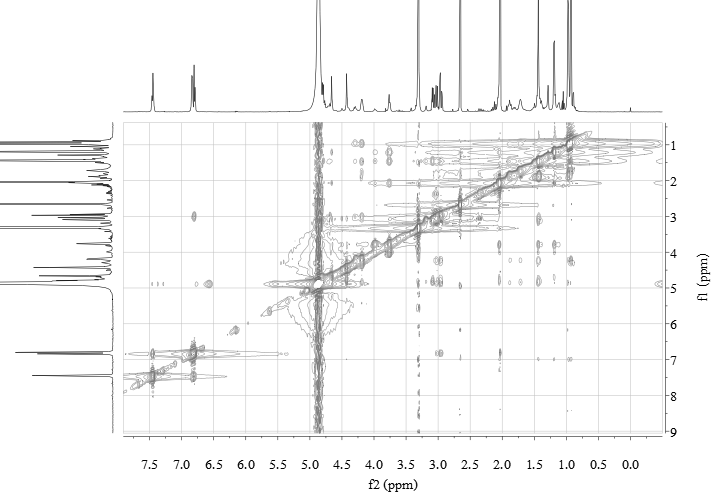


**Figure S18.** NOESY spectrum of **5** in methanol-*d4*.


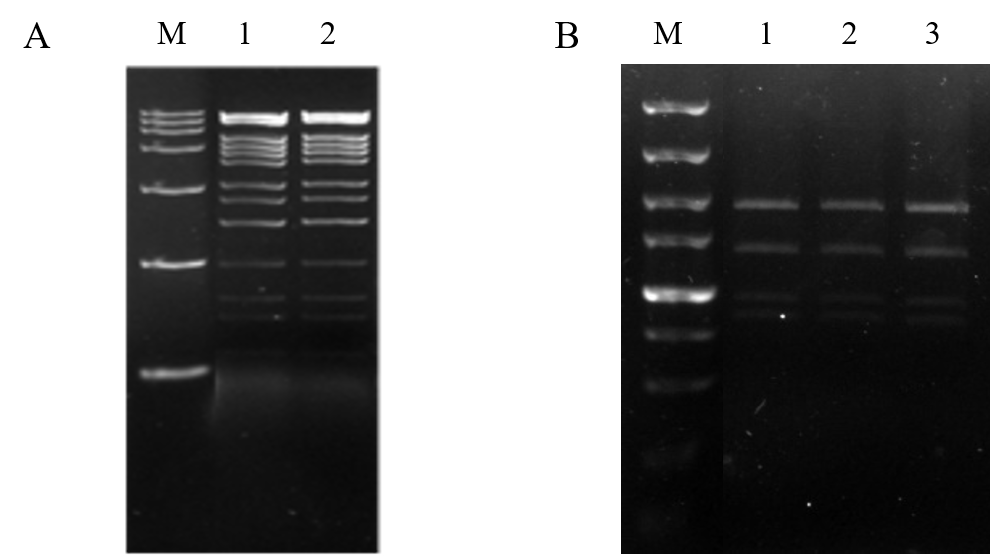


**Figure S19.** (A) Digestion map of NRPS/PKS gene cluster. M: DL15000 DNA Marker, 1,2: plasmid p15A-*cm-ami* digested by restriction enzyme *AflⅢ*. (B) Digestion map of *ace* gene cluster. M: DL5000 DNA Marker, 1,2,3: plasmid p15A-*apra-ace* digested by restriction enzyme *Ava* Ⅰand *Eco* RV.
